# Supplementary material for: C5, A Cassaine Diterpenoid Amine, Induces Apoptosis via the Extrinsic Pathways in Human Lung Cancer Cells and Human Lymphoma Cells
Source: MDPI journal article supplement (doi:10.3390/ijms21041298), 2020-02-14
Supplement: s1 [file s1]

## Supplementary Materials

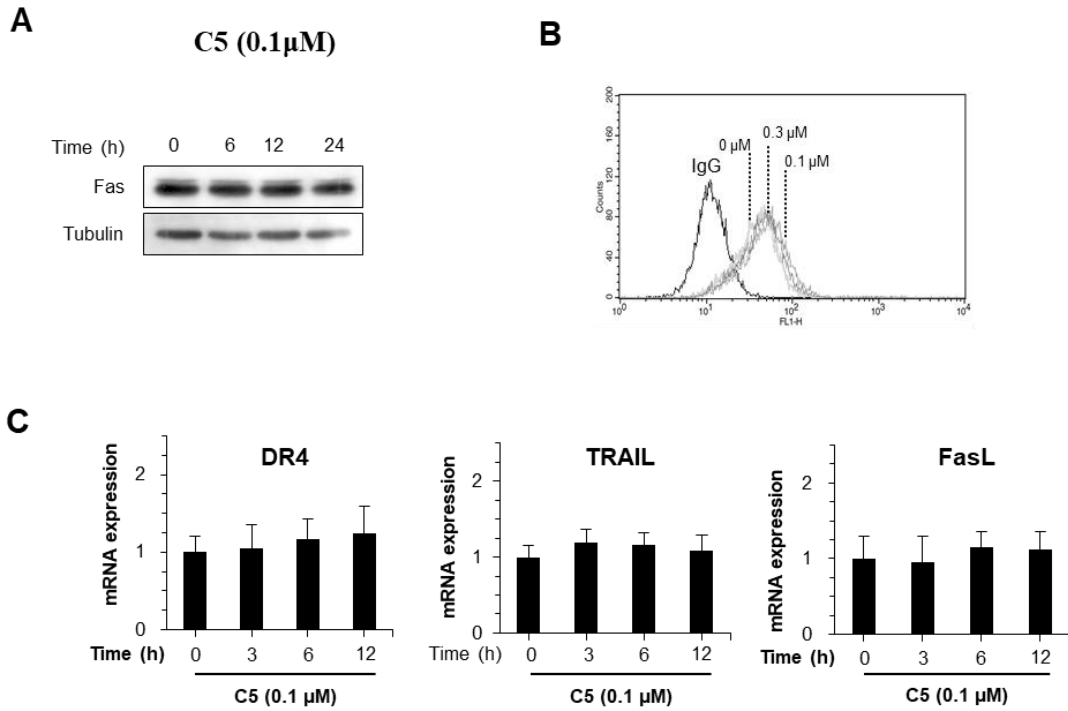

**Figure S1.** C5 does not regulate expression of death receptor and death ligand. (A) The expression level of the death-receptor for C5 treated as 0.1 $\mu$ M at the indicated time in Ramos cells. (B) Flow cytometry assay for measurement of death receptor expression in response to C5 at the indicated concentration in Ramos cells. (C) After treated with 0.1 $\mu$ M C5 at the indicated time in Ramos cells, mRNA level of death ligands measured by qRT-PCR.
